# Supplementary material
Source: PubMed Central journal article supplement (PMC4199391)
Supplement: NIHMS618651-supplement-01.pdf [file NIHMS618651-supplement-01.pdf]

**Table S1. Sequence Data Used for Genome Assembly (Illumina and PacBio) and Validation (Fosmids and BACs), Related to Table 1**

| <b>Illumina</b> | <b>Insert size (bp)</b> | <b>Read pair (million) x 101 bp</b> | <b>Total bases (Gbp)</b> | <b>Average genome coverage (x)</b> |
|-----------------|-------------------------|-------------------------------------|--------------------------|------------------------------------|
|                 | 300                     | 42.9                                | 8.2                      | 10.8                               |
|                 | 350                     | 75.7                                | 15.0                     | 24.5                               |
|                 | 400                     | 45.5                                | 9.0                      | 15.2                               |
|                 | 450                     | 72.0                                | 14.3                     | 24.7                               |
|                 | 500                     | 149.6                               | 28.2                     | 38.1                               |

  

| <b>PacBio</b> | <b># CLR reads</b> | <b>Total bases (Gbp)</b> | <b>mean/max read length (bp)</b> | <b>Coverage (x)</b> |
|---------------|--------------------|--------------------------|----------------------------------|---------------------|
| uncorrected   | 2,136,706          | 10.9                     | 5,093/36,663                     | 14.5                |
| corrected     | 1,369,600          | 7.9                      | 6,990/33,949                     | 12.3                |

  

|                |                      |                                                     |
|----------------|----------------------|-----------------------------------------------------|
| <b>fosmids</b> | Illumina             | 300 fosmids (43.7 million reads, insert 300bp)      |
|                | Fosmid ends (Sanger) | 285 ends from 178 fosmids (average length 719.4 bp) |

  

|             |                   |                                                   |
|-------------|-------------------|---------------------------------------------------|
| <b>BACs</b> | Illumina          | 6 BACs (36.3 million read pairs, insert 300bp)    |
|             | PacBio            | 6 BACs (721,069 CLR reads, median length 2333 bp) |
|             | BAC ends (Sanger) | 119 ends from 61 BACs (average length 667.1 bp)   |

**Table S2. Properties of Gene Predictions Limited to the Germline Genome (MIC) vs. Those Lacking IESs (IES-less) or Specific to the MAC (Swart et al., 2013), Related to Figure 5**

Gene lengths are from the predicted start to stop codons and exclude UTRs.

|                               | Feature | Number | Mean (bp) | Min (bp) | Max (bp) | % GC |
|-------------------------------|---------|--------|-----------|----------|----------|------|
| <b>MIC</b>                    | Genes   | 810    | 727.8     | 150      | 3,488    | 34.6 |
|                               | Exons   | 904    | 647.6     | 7        | 2,961    | 34.6 |
|                               | Introns | 94     | 40.1      | 29       | 118      | 23.7 |
| <b>IES-less</b>               | Genes   | 530    | 1,102     | 153      | 4,884    | 33.5 |
|                               | Exons   | 1,147  | 480.7     | 3        | 4,884    | 34.3 |
|                               | Introns | 617    | 74.8      | 29       | 424      | 24   |
| <b>MAC<br/>(contain IESs)</b> | Genes   | 16,506 | 1,863     | 150      | 65,451   | 34   |
|                               | Exons   | 42,628 | 665.8     | 3        | 45,409   | 34.2 |
|                               | Introns | 26,122 | 90.3      | 28       | 549      | 23.6 |

Swart, E.C., Nowacki, M., Shum, J., Stiles, H., Higgins, B.P., Doak, T.G., Schotanus, K., Magrini, V.J., Minx, P., Mardis, E.R., et al. (2012). The *Oxytricha trifallax* mitochondrial genome. *Genome Biol. Evol.* 4, 136–154.

**Table S5. *Oxytricha* MIC-Specific Protein Domains Absent from the *Oxytricha* MAC, Related to Figure 5**

| <b>Protein ID</b>      | <b>E-value</b> | <b>Pfam ID</b> | <b>Domain name</b> | <b>Domain description</b>             |
|------------------------|----------------|----------------|--------------------|---------------------------------------|
| ctg7180000069235.g1610 | 1.10E-08       | PF09696.4      | Ctf8               | Ctf8                                  |
| ctg7180000090708.g2446 | 8.20E-06       | PF02097.9      | Filo_VP35          | Filoviridae VP35                      |
| ctg7180000067603.g50   | 0.00014        | PF01057.11     | Parvo_NS1          | Parvovirus non-structural protein NS1 |
| ctg7180000069340.g682  | 5.00E-05       | PF01057.11     | Parvo_NS1          | Parvovirus non-structural protein NS1 |
| ctg7180000070525.g472  | 1.90E-05       | PF01057.11     | Parvo_NS1          | Parvovirus non-structural protein NS1 |
| deg7180000041353.g1621 | 1.70E-05       | PF01057.11     | Parvo_NS1          | Parvovirus non-structural protein NS1 |
| ctg7180000072061.g1205 | 1.10E-05       | PF01057.11     | Parvo_NS1          | Parvovirus non-structural protein NS1 |
| ctg7180000087953.g2027 | 1.00E-07       | PF01057.11     | Parvo_NS1          | Parvovirus non-structural protein NS1 |
| ctg7180000070723.g1844 | 8.30E-08       | PF01057.11     | Parvo_NS1          | Parvovirus non-structural protein NS1 |
| deg7180000045973.g357  | 6.90E-05       | PF07517.8      | SecA_DEAD          | SecA DEAD-like domain                 |
| ctg7180000069656.g2362 | 5.20E-06       | PF07517.8      | SecA_DEAD          | SecA DEAD-like domain                 |
| ctg7180000089613.g372  | 6.90E-07       | PF07517.8      | SecA_DEAD          | SecA DEAD-like domain                 |
| ctg7180000067946.g928  | 3.40E-07       | PF07517.8      | SecA_DEAD          | SecA DEAD-like domain                 |

**Table S7. Predicted Genes Associated with Transposable Elements, Validated by Mass Spectrometry, Related to Figure 5**

| <b>Gene ID</b>         | <b>#Unique peptides</b> | <b>#Unique peptides with PTM</b> | <b>Modifications</b>                                      | <b>Annotation</b> |
|------------------------|-------------------------|----------------------------------|-----------------------------------------------------------|-------------------|
| deg7180000046018.g1521 |                         | 1                                | K215(Acetyl)                                              | <i>Helitron</i>   |
| ctg7180000070707.g263  |                         | 1                                | K401(Acetyl)                                              | <i>Helitron</i>   |
| ctg7180000076960.g1909 | 1                       |                                  |                                                           | <i>Helitron</i>   |
| ctg7180000095219.g852  |                         | 2                                | T301(Phospho),K463(Acetyl)                                | <i>Helitron</i>   |
| ctg7180000081305.g1372 |                         | 1                                | T153(Phospho),T154(Phospho)                               | <i>Helitron</i>   |
| ctg7180000070403.g1120 |                         | 1                                | K561(Acetyl)                                              | LINE              |
| ctg7180000088525.g882  | 1                       | 1                                | K172(Acetyl),K176(Acetyl)<br>T356(Phospho),T369(Phospho), | LINE              |
| deg7180000034613.g1354 |                         | 2                                | K415(Acetyl),K416(Acetyl)                                 | LINE              |
| ctg7180000089514.g961  |                         | 1                                | K11(Acetyl)                                               | LINE              |
| ctg7180000072060.g1207 |                         | 1                                | K105(Acetyl)                                              | LINE              |
| ctg7180000069069.g2003 |                         | 1                                | S269(Phospho)                                             | LINE              |
| ctg7180000068912.g1862 |                         | 1                                | K538(Acetyl)                                              | LINE              |
| ctg7180000069518.g111  |                         | 1                                | K112(Acetyl)                                              | LINE              |
| ctg7180000091356.g1584 |                         | 1                                | K688(Acetyl)                                              | LINE              |
| ctg7180000069692.g1505 |                         | 2                                | K771(Acetyl),K49(Acetyl)                                  | LINE              |
| ctg7180000067836.g1659 | 1                       | 1                                | Y246(Phospho)                                             | LINE              |
| ctg7180000073360.g2348 |                         | 1                                | T769(Phospho)                                             | LINE              |
| ctg7180000094475.g1121 |                         | 1                                | T377(Phospho),T381(Phospho)                               | LINE              |

**Table S8. Repeat Content of the MIC Genome, Related to Figure 5**

|                          | <b>% Genome assembly coverage</b> | <b>% Illumina read coverage<sup>1</sup></b> | <b>% PacBio read coverage<sup>2</sup></b> | <b>% Fosmid end sequence coverage<sup>3</sup></b> |
|--------------------------|-----------------------------------|---------------------------------------------|-------------------------------------------|---------------------------------------------------|
| <b>TEs</b>               |                                   |                                             |                                           |                                                   |
| Class 1 LINE             | 1.21                              | 0.83                                        | 0.89                                      | 0                                                 |
| Class 2 TBE              | 15.6                              | 15.0                                        | 15.2                                      | 8.43                                              |
| Class 2 <i>Helitron</i>  | 0.33                              | 0.26                                        | 0.33                                      | 0                                                 |
| Class 2 IS               | 0.20                              | 0.12                                        | 0.16                                      | 0                                                 |
| <b>Satellite repeats</b> |                                   |                                             |                                           |                                                   |
| 380bp                    | 1.40                              | 8.46                                        | 5.70                                      | 19.7                                              |
| 170bp                    | 1.22                              | 6.57                                        | 3.12                                      | 27.5                                              |
| Others                   | 0.65                              | 0.69                                        | 1.52                                      | 1.12 (16.3*)                                      |
| <b>Not categorized</b>   | 15.3                              | 13.1                                        | 13.8                                      | 4.49                                              |
| <b>Total</b>             | <b>35.9</b>                       | <b>45.0</b>                                 | <b>40.7</b>                               | <b>77.5</b>                                       |

1. 12 million randomly sampled Illumina reads (total bases 1.2Gb)
2. 145,545 randomly sampled error-corrected PacBio reads (total bases 1.1Gb)
3. 178 fosmid end sequences sequenced by Sanger method (total bases 129kb)

\* Two out of 178 (1.12%) match satellite repeat families identified by RepeatModeler. Another 29 (16.3%) belong to new families of satellite repeats that RepeatModeler did not identify.
